# Supplementary material
Source: MDPI journal article supplement (https://www.mdpi.com/2073-4352/11/9/1069)
Supplement: s1 [file s1 › crystals-1335971-supplementary.pdf]

Supporting Information for

# Growth of Acetaminophen Polymorphic Crystals and Solution-Mediated Phase Transition from Trihydrate to Form II in Agarose Gel

Akari Nishigaki <sup>1</sup>, Mihoko Maruyama <sup>1,2,3,\*</sup>, Shun-ichi Tanaka <sup>1</sup>, Hiroshi Y. Yoshikawa <sup>2,4</sup>, Masayuki Imanishi <sup>2</sup>, Masashi Yoshimura <sup>5</sup>, Yusuke Mori <sup>2</sup> and Kazufumi Takano <sup>1,\*</sup>

<sup>1</sup> Graduate School of Life and Environmental Sciences, Kyoto Prefectural University, 1-5, Hangi-cho, Shimogamo, Sakyo-ku, Kyoto City, Kyoto 606-8522 Japan;

<sup>2</sup> Graduate School of Engineering, Osaka University, 2-1, Yamadaoka, Suita City, Osaka 565-0871 Japan;

<sup>3</sup> Institute for Advanced Co-Creation Studies, Osaka University, 2-1, Yamadaoka, Suita City, Osaka 565-0871 Japan

<sup>4</sup> Department of Chemistry, Saitama University, 255, Shimoookubo, Sakura-ku, Saitama City, Saitama 338-8570 Japan

<sup>5</sup> Institute of Laser Engineering, Osaka University, 2-6, Yamadaoka, Suita City, Osaka 565-0871 Japan

\* Correspondence: maruyama@cryst.eei.eng.osaka-u.ac.jp (M. Maruyama), takano@kpu.ac.jp (K. Takano)

## 1. PXRD patterns and Raman spectra of acetaminophen crystals

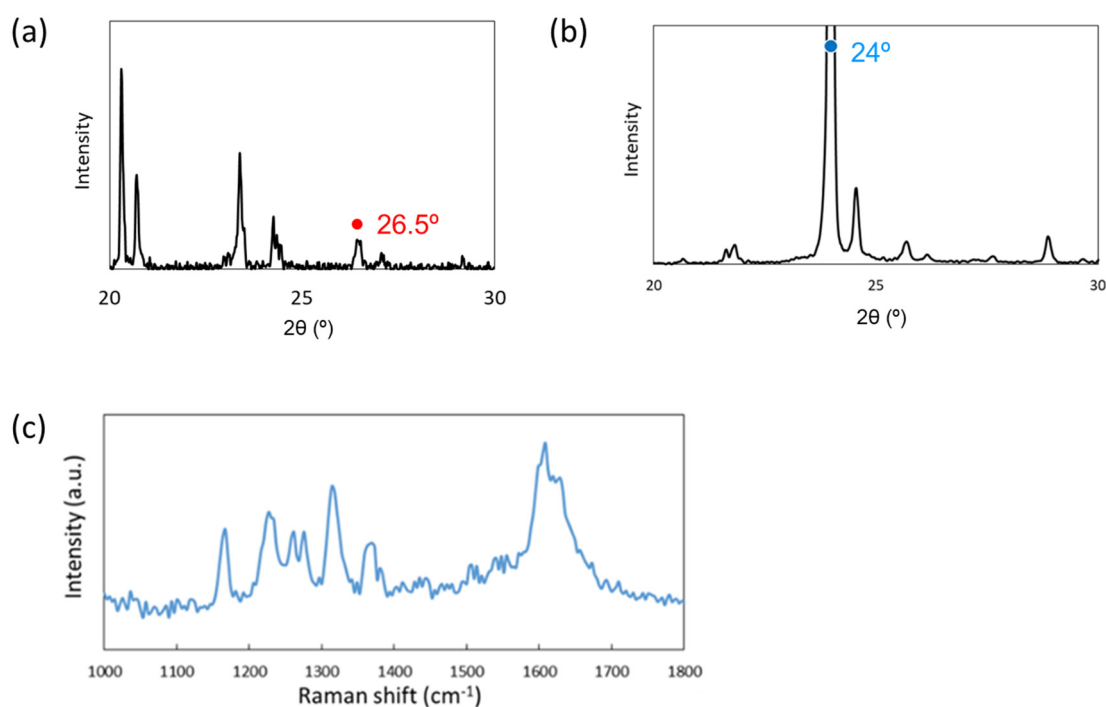

**Figure S1.** (a) PXRD patterns of the crystals obtained in the first paragraph of Section 3.2, (b) PXRD patterns of the prism-like crystals and (c) Raman spectra of crystals obtained by seeding trihydrate, which was separately prepared in solution using a stirring ball.

Forms I and II have characteristic peaks at around  $26.5$  and  $24^\circ$ , respectively, by PXRD [1]. Figure S1a shows that the PXRD patterns of the crystals matched well with those of form I. Figure S1b shows that the PXRD patterns of the crystals matched well with those of form II. Figure S1c shows that the obtained Raman spectra of the crystals matched that previously reported for trihydrate [2].

## 2. Dissolution of a form II crystal

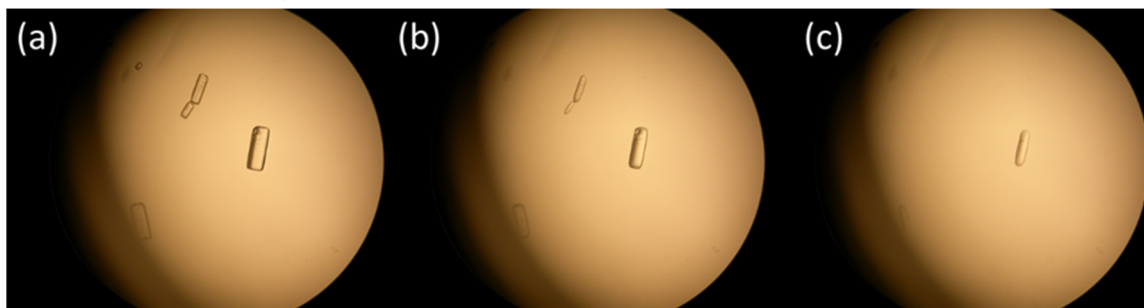

**Figure S2.** Dissolution of a form II crystal. After (a) 2 min, (b) 6 min and (c) 10 min.

## References

1. Mori, Y.; Maruyama, M.; Takahashi, Y.; Ikeda, K.; Fukukita, S.; Yoshikawa, H.; Okada, S.; Adachi, H.; Sugiyama, S.; Takano, K.; Murakami, S.; Matsumura, H.; Inoue, T.; Yoshimura, M.; Mori, Y. Selective crystallization of metastable phase of acetaminophen by ultrasonic irradiation. *Appl. Phys. Express* 2015, 8, 065501.
2. Fujimoto, R.; Maruyama, M.; Okada, S.; Adachi, H.; Yoshikawa, H.; Takano, K.; Imanishi, M.; Tsukamoto, K.; Yoshimura, M.; Mori, Y. Large-scale crystallization of acetaminophen trihydrate by a novel stirring technique. *Appl. Phys. Express* 2019, 12, 045503.
